# Supplementary material for: Comprehensive Characterization of Necroptosis‐Related lncRNAs in Bladder Cancer Identifies a Novel Signature for Prognosis Prediction
Source: Hindawi journal article supplement (doi:10.1155/2022/2360299), 2022-01-01
Supplement: f1 [file 2360299.f1.pdf]

---

| Gene          | Type   |
|---------------|--------|
| AC092301.1    | lncRNA |
| AL133338.1    | lncRNA |
| AC002128.1    | lncRNA |
| AL109955.1    | lncRNA |
| AC104825.1    | lncRNA |
| AC006042.1    | lncRNA |
| AC092611.1    | lncRNA |
| MCF2L-AS1     | lncRNA |
| AC025766.1    | lncRNA |
| AL121820.1    | lncRNA |
| AC087286.2    | lncRNA |
| AC073957.3    | lncRNA |
| AC084018.2    | lncRNA |
| CDKN2A-DT     | lncRNA |
| AL353622.2    | lncRNA |
| AL133467.1    | lncRNA |
| AC024267.3    | lncRNA |
| AL161891.1    | lncRNA |
| AC124312.2    | lncRNA |
| AP000766.1    | lncRNA |
| AC104785.1    | lncRNA |
| AC074117.1    | lncRNA |
| AC040162.3    | lncRNA |
| DNM3OS        | lncRNA |
| AL355574.1    | lncRNA |
| AC025031.1    | lncRNA |
| CH17-340M24.3 | lncRNA |
| AC008764.6    | lncRNA |
| AC023908.3    | lncRNA |
| AC018809.1    | lncRNA |
| AC027449.1    | lncRNA |
| AL159169.3    | lncRNA |
| AL021707.4    | lncRNA |
| AL158166.1    | lncRNA |
| AC005790.1    | lncRNA |
| AC104532.2    | lncRNA |
| MIR1-1HG-AS1  | lncRNA |
| AC092803.1    | lncRNA |
| AC104170.1    | lncRNA |
| AL357054.4    | lncRNA |
| AC009095.1    | lncRNA |

|            |        |
|------------|--------|
| AL096870.2 | lncRNA |
| AC025280.1 | lncRNA |
| AL136038.4 | lncRNA |
| TFAP2A-AS1 | lncRNA |
| RMRP       | lncRNA |
| NCBP2-AS1  | lncRNA |
| AC015802.4 | lncRNA |
| AC018766.1 | lncRNA |
| AC027307.3 | lncRNA |
| AL117335.1 | lncRNA |
| LINC01322  | lncRNA |
| YEATS2-AS1 | lncRNA |
| MHENCRC    | lncRNA |
| AC079160.1 | lncRNA |
| AC026740.1 | lncRNA |
| AC087521.1 | lncRNA |
| AC108463.2 | lncRNA |
| AL391807.1 | lncRNA |
| LINC00641  | lncRNA |
| AL133355.1 | lncRNA |
| LINC02195  | lncRNA |
| LINC00426  | lncRNA |
| CASC2      | lncRNA |
| AC018926.2 | lncRNA |
| LINC02489  | lncRNA |
| ODF2-AS1   | lncRNA |
| AL023284.4 | lncRNA |
| AL139397.1 | lncRNA |
| MIR497HG   | lncRNA |
| AC107308.1 | lncRNA |
| AC009754.1 | lncRNA |
| AC007128.2 | lncRNA |
| AC092127.2 | lncRNA |
| AC124068.2 | lncRNA |
| LINC01124  | lncRNA |
| RAB11B-AS1 | lncRNA |
| AL662844.4 | lncRNA |
| AL133346.1 | lncRNA |
| AC018653.3 | lncRNA |
| AC107959.1 | lncRNA |
| LINC00910  | lncRNA |
| AP001793.1 | lncRNA |
| AC036108.3 | lncRNA |
| MCCC1-AS1  | lncRNA |

|                |        |
|----------------|--------|
| LINC01550      | lncRNA |
| AC007622.2     | lncRNA |
| AP006621.3     | lncRNA |
| AP001107.1     | lncRNA |
| AC008608.2     | lncRNA |
| AL365361.1     | lncRNA |
| AL441992.1     | lncRNA |
| TMPO-AS1       | lncRNA |
| AL390067.1     | lncRNA |
| LINC02384      | lncRNA |
| AP005329.1     | lncRNA |
| MIR4435-2HG    | lncRNA |
| AL670729.1     | lncRNA |
| AC024075.3     | lncRNA |
| AC092376.2     | lncRNA |
| GATA3-AS1      | lncRNA |
| AC005387.1     | lncRNA |
| AP003071.4     | lncRNA |
| AP003086.2     | lncRNA |
| AC139887.1     | lncRNA |
| THAP9-AS1      | lncRNA |
| KDM4A-AS1      | lncRNA |
| WASHC5-AS1     | lncRNA |
| LINC01781      | lncRNA |
| RASSF8-AS1     | lncRNA |
| MAGEA10-MAGEA5 | lncRNA |
| MIR600HG       | lncRNA |
| AC069281.2     | lncRNA |
| LINC00885      | lncRNA |
| XXYLT1-AS2     | lncRNA |
| AL078644.1     | lncRNA |
| AC108449.2     | lncRNA |
| AL132780.1     | lncRNA |
| ARRDC1-AS1     | lncRNA |
| AL133415.1     | lncRNA |
| U62317.1       | lncRNA |
| AC068790.7     | lncRNA |
| AC053503.4     | lncRNA |
| AL691482.3     | lncRNA |
| LINC00894      | lncRNA |
| SNHG7          | lncRNA |
| KRT7-AS        | lncRNA |
| AP003392.4     | lncRNA |
| AL031709.1     | lncRNA |

|              |        |
|--------------|--------|
| AC129510.1   | lncRNA |
| AL118506.1   | lncRNA |
| AC024075.1   | lncRNA |
| MEG9         | lncRNA |
| AC138932.1   | lncRNA |
| LINC00941    | lncRNA |
| AL139041.1   | lncRNA |
| AP001625.2   | lncRNA |
| AC079921.2   | lncRNA |
| AC009093.6   | lncRNA |
| CRTC3-AS1    | lncRNA |
| C8orf44      | lncRNA |
| FAM218A      | lncRNA |
| AC009065.4   | lncRNA |
| SH3RF3-AS1   | lncRNA |
| AC090825.1   | lncRNA |
| AC005104.1   | lncRNA |
| LINC01081    | lncRNA |
| AL161452.1   | lncRNA |
| AC008764.8   | lncRNA |
| TRAF3IP2-AS1 | lncRNA |
| ADAMTS9-AS1  | lncRNA |
| AC008735.2   | lncRNA |
| AC079313.2   | lncRNA |
| AC007292.1   | lncRNA |
| AC008537.2   | lncRNA |
| AC010618.2   | lncRNA |
| ANKRD10-IT1  | lncRNA |
| LINC01405    | lncRNA |
| MAGI2-AS3    | lncRNA |
| LINC01119    | lncRNA |
| AF117829.1   | lncRNA |
| AL121652.1   | lncRNA |
| AC013553.3   | lncRNA |
| AC244034.2   | lncRNA |
| AC016888.1   | lncRNA |
| OSMR-AS1     | lncRNA |
| AC023825.2   | lncRNA |
| ZKSCAN2-DT   | lncRNA |
| AC009041.2   | lncRNA |
| ZNF252P-AS1  | lncRNA |
| AC005785.1   | lncRNA |
| AF001548.1   | lncRNA |
| AC005332.1   | lncRNA |

|            |        |
|------------|--------|
| AC010998.2 | lncRNA |
| DHRS4-AS1  | lncRNA |
| AL121929.2 | lncRNA |
| MYOSLID    | lncRNA |
| NRIR       | lncRNA |
| DUBR       | lncRNA |
| AC015849.4 | lncRNA |
| CEBPA-DT   | lncRNA |
| AC019131.2 | lncRNA |
| AL132655.2 | lncRNA |
| AC126755.1 | lncRNA |
| ZNF32-AS2  | lncRNA |
| AC007128.1 | lncRNA |
| HM13-IT1   | lncRNA |
| AC002398.2 | lncRNA |
| AC116407.2 | lncRNA |
| LINC01213  | lncRNA |
| LINC01675  | lncRNA |
| AL157871.5 | lncRNA |
| AC020978.7 | lncRNA |
| AC027601.3 | lncRNA |
| LINC01139  | lncRNA |
| AC018529.1 | lncRNA |
| AC073046.1 | lncRNA |
| AP003352.1 | lncRNA |
| AC006435.2 | lncRNA |
| AC021087.1 | lncRNA |
| AL731577.2 | lncRNA |
| MAL2-AS1   | lncRNA |
| AC073869.1 | lncRNA |
| AL163953.1 | lncRNA |
| AC099850.3 | lncRNA |
| AL118511.1 | lncRNA |
| AC144548.1 | lncRNA |
| AC002398.1 | lncRNA |
| AC010326.3 | lncRNA |
| AP4B1-AS1  | lncRNA |
| AL390728.4 | lncRNA |
| AC136475.2 | lncRNA |
| AC092910.3 | lncRNA |
| LINC02285  | lncRNA |
| AC011933.3 | lncRNA |
| LINC02109  | lncRNA |
| SPAG5-AS1  | lncRNA |

|                            |        |
|----------------------------|--------|
| LINC02361                  | lncRNA |
| AC010976.2                 | lncRNA |
| LINC01411                  | lncRNA |
| AC135507.1                 | lncRNA |
| AC012073.1                 | lncRNA |
| AC005332.7                 | lncRNA |
| AP000892.3                 | lncRNA |
| LINC02084                  | lncRNA |
| LINC01126                  | lncRNA |
| LINC01353                  | lncRNA |
| AC092811.1                 | lncRNA |
| AL390294.1                 | lncRNA |
| AC024361.3                 | lncRNA |
| ACTA2-AS1                  | lncRNA |
| LINC01355                  | lncRNA |
| AL133371.2                 | lncRNA |
| LINC02577                  | lncRNA |
| STAG3L5P-PVRIG2P-<br>PILRB | lncRNA |
| AC005070.3                 | lncRNA |
| CCDC183-AS1                | lncRNA |
| AC090589.3                 | lncRNA |
| FGF12-AS3                  | lncRNA |
| AC139887.2                 | lncRNA |
| AC004449.1                 | lncRNA |
| PSPC1-AS2                  | lncRNA |
| AC018752.1                 | lncRNA |
| AC017002.3                 | lncRNA |
| AC004943.2                 | lncRNA |
| LINC02352                  | lncRNA |
| FTX                        | lncRNA |
| AL592424.1                 | lncRNA |
| AL512770.1                 | lncRNA |
| SNHG10                     | lncRNA |
| CDKN2B-AS1                 | lncRNA |
| AC017104.1                 | lncRNA |
| AL450998.2                 | lncRNA |
| CHL1-AS2                   | lncRNA |
| AC024451.4                 | lncRNA |
| NDUFB2-AS1                 | lncRNA |
| A2M-AS1                    | lncRNA |
| AL928654.2                 | lncRNA |
| HAND2-AS1                  | lncRNA |
| TRG-AS1                    | lncRNA |

|             |        |
|-------------|--------|
| AL161772.1  | lncRNA |
| AL590729.1  | lncRNA |
| AC010168.2  | lncRNA |
| LINC01820   | lncRNA |
| AC008735.1  | lncRNA |
| LINC01004   | lncRNA |
| GHRLOS      | lncRNA |
| AC005180.1  | lncRNA |
| AL117329.1  | lncRNA |
| AC026401.3  | lncRNA |
| AC091057.1  | lncRNA |
| NBR2        | lncRNA |
| LINC02100   | lncRNA |
| FLJ12825    | lncRNA |
| AC011477.3  | lncRNA |
| AC027601.1  | lncRNA |
| ZFHX4-AS1   | lncRNA |
| AC245060.6  | lncRNA |
| AC007637.1  | lncRNA |
| AC008735.4  | lncRNA |
| AC011461.1  | lncRNA |
| MORF4L2-AS1 | lncRNA |
| AL513165.1  | lncRNA |
| AC010491.1  | lncRNA |
| TGFB2-AS1   | lncRNA |
| AC015922.2  | lncRNA |
| AC008750.1  | lncRNA |
| AL139352.1  | lncRNA |
| AC027097.2  | lncRNA |
| AC010247.2  | lncRNA |
| ATP2A1-AS1  | lncRNA |
| AC022893.1  | lncRNA |
| LINC02241   | lncRNA |
| HHIP-AS1    | lncRNA |
| AC006557.1  | lncRNA |
| AL032819.1  | lncRNA |
| AC106897.1  | lncRNA |
| C1orf220    | lncRNA |
| GNG12-AS1   | lncRNA |
| AC099482.1  | lncRNA |
| AC092802.2  | lncRNA |
| AC125257.1  | lncRNA |
| AC006369.1  | lncRNA |
| SNRK-AS1    | lncRNA |

|             |        |
|-------------|--------|
| AC027682.4  | lncRNA |
| NIFK-AS1    | lncRNA |
| LENG8-AS1   | lncRNA |
| AL604028.1  | lncRNA |
| AC134043.2  | lncRNA |
| LINC01833   | lncRNA |
| CARMN       | lncRNA |
| RUSC1-AS1   | lncRNA |
| MEG3        | lncRNA |
| AC010503.4  | lncRNA |
| LINC00861   | lncRNA |
| MANEA-DT    | lncRNA |
| AC025031.4  | lncRNA |
| MBNL1-AS1   | lncRNA |
| AC106864.1  | lncRNA |
| LINC01936   | lncRNA |
| AC092119.2  | lncRNA |
| CACNA1C-AS2 | lncRNA |
| AC008555.1  | lncRNA |
| ZNF436-AS1  | lncRNA |
| PCAT7       | lncRNA |
| AC105339.2  | lncRNA |
| MAP3K14-AS1 | lncRNA |
| NKILA       | lncRNA |
| AP006621.2  | lncRNA |
| AC127024.4  | lncRNA |
| AC005330.1  | lncRNA |
| AL590652.1  | lncRNA |
| LINC01342   | lncRNA |
| AC034102.8  | lncRNA |
| AL731567.1  | lncRNA |
| AP001462.1  | lncRNA |
| AC093788.1  | lncRNA |
| PCAT19      | lncRNA |
| AC080129.2  | lncRNA |
| NPTN-IT1    | lncRNA |
| GAS6-DT     | lncRNA |
| AC024361.1  | lncRNA |
| LINC01719   | lncRNA |
| U62317.2    | lncRNA |
| AC092123.1  | lncRNA |
| WASIR2      | lncRNA |
| AC010976.1  | lncRNA |
| AC010201.2  | lncRNA |



|             |        |
|-------------|--------|
| AL449423.1  | lncRNA |
| AC020928.1  | lncRNA |
| AL161729.4  | lncRNA |
| STAM-AS1    | lncRNA |
| AC124944.3  | lncRNA |
| AL157394.1  | lncRNA |
| AC109460.2  | lncRNA |
| AC012615.6  | lncRNA |
| SOX1-OT     | lncRNA |
| AP001189.1  | lncRNA |
| AC090152.1  | lncRNA |
| FOXD3-AS1   | lncRNA |
| EMX2OS      | lncRNA |
| LINC02178   | lncRNA |
| C9orf163    | lncRNA |
| AC106881.1  | lncRNA |
| AC010542.5  | lncRNA |
| AL450384.1  | lncRNA |
| LINC01140   | lncRNA |
| AC108471.2  | lncRNA |
| AC067852.3  | lncRNA |
| TTLL11-IT1  | lncRNA |
| AP000866.5  | lncRNA |
| AC119396.1  | lncRNA |
| AC008543.1  | lncRNA |
| HDAC2-AS2   | lncRNA |
| AP002761.1  | lncRNA |
| AC005519.1  | lncRNA |
| LINC01775   | lncRNA |
| AP003071.3  | lncRNA |
| AC092809.4  | lncRNA |
| PAXIP1-AS2  | lncRNA |
| PPP1R26-AS1 | lncRNA |
| PP7080      | lncRNA |
| LINC01134   | lncRNA |
| BX322562.1  | lncRNA |
| AC138956.2  | lncRNA |
| LINC00173   | lncRNA |
| FENDRR      | lncRNA |
| LINC01852   | lncRNA |
| VIM-AS1     | lncRNA |
| CYTOR       | lncRNA |
| AC006042.3  | lncRNA |
| MIR100HG    | lncRNA |

|             |        |
|-------------|--------|
| AC021242.3  | lncRNA |
| GAS8-AS1    | lncRNA |
| AL021707.8  | lncRNA |
| NARF-IT1    | lncRNA |
| AC020663.2  | lncRNA |
| AL031282.2  | lncRNA |
| AC245052.4  | lncRNA |
| AL354993.2  | lncRNA |
| LINC01914   | lncRNA |
| AC025287.3  | lncRNA |
| DANCR       | lncRNA |
| AL445423.1  | lncRNA |
| AC092171.5  | lncRNA |
| AC104971.1  | lncRNA |
| AC009148.1  | lncRNA |
| DCST1-AS1   | lncRNA |
| MAP3K20-AS1 | lncRNA |
| AL117350.1  | lncRNA |
| AL158166.2  | lncRNA |
| FMR1-IT1    | lncRNA |
| AL596244.1  | lncRNA |
| AP000866.1  | lncRNA |
| AC024075.2  | lncRNA |
| AC093278.2  | lncRNA |
| AL132642.1  | lncRNA |
| AP001619.1  | lncRNA |
| AL583785.1  | lncRNA |
| LINC02156   | lncRNA |
| U62631.1    | lncRNA |
| AL121832.3  | lncRNA |
| LINC00456   | lncRNA |
| AC010761.4  | lncRNA |
| LINC02202   | lncRNA |
| AC012645.2  | lncRNA |
| LINC01943   | lncRNA |
| AC234775.3  | lncRNA |
| LINC01410   | lncRNA |
| LINC01082   | lncRNA |
| CAPN10-DT   | lncRNA |
| C1RL-AS1    | lncRNA |
| LINC00630   | lncRNA |
| AP001107.5  | lncRNA |
| AC244093.5  | lncRNA |
| CEP83-DT    | lncRNA |

|            |        |
|------------|--------|
| AC087294.1 | lncRNA |
| AC004253.1 | lncRNA |
| LINC01215  | lncRNA |
| AL354892.2 | lncRNA |
| AL158212.3 | lncRNA |
| LINC00702  | lncRNA |
| AC008764.2 | lncRNA |
| AL136295.2 | lncRNA |
| AP002336.2 | lncRNA |
| LINC01352  | lncRNA |
| CDC42-IT1  | lncRNA |
| AC022150.2 | lncRNA |
| AC016876.3 | lncRNA |
| AC020911.1 | lncRNA |
| AP001189.3 | lncRNA |
| AL157838.1 | lncRNA |
| SSBP3-AS1  | lncRNA |
| SNHG9      | lncRNA |
| AL135999.1 | lncRNA |
| AC002310.1 | lncRNA |
| AC015819.1 | lncRNA |
| AL365330.1 | lncRNA |
| AC004034.1 | lncRNA |
| AC005180.2 | lncRNA |
| LINC00900  | lncRNA |
| AC073052.1 | lncRNA |
| PTPRG-AS1  | lncRNA |
| LINC02584  | lncRNA |
| LINC02588  | lncRNA |
| AC008543.3 | lncRNA |
| LINC02104  | lncRNA |
| AC021491.2 | lncRNA |
| FBXL19-AS1 | lncRNA |
| AC090559.1 | lncRNA |
| SNHG26     | lncRNA |
| LINC00892  | lncRNA |
| AC092794.1 | lncRNA |
| AL592211.1 | lncRNA |
| AL139393.2 | lncRNA |
| AC083906.3 | lncRNA |
| AC015849.3 | lncRNA |
| MCM3AP-AS1 | lncRNA |
| AC084125.2 | lncRNA |
| AC021683.1 | lncRNA |

|             |        |
|-------------|--------|
| Z94721.1    | lncRNA |
| AC009299.2  | lncRNA |
| AC010271.2  | lncRNA |
| AC007384.1  | lncRNA |
| AL138756.1  | lncRNA |
| AL356019.2  | lncRNA |
| TSPOAP1-AS1 | lncRNA |
| NARF-AS1    | lncRNA |
| AC124312.3  | lncRNA |
| AL442128.2  | lncRNA |
| AC078795.1  | lncRNA |
| AC108860.2  | lncRNA |
| AC100778.2  | lncRNA |
| AL138995.1  | lncRNA |
| AC013403.2  | lncRNA |
| AC127070.1  | lncRNA |
| AL109741.1  | lncRNA |
| AF131215.5  | lncRNA |
| AL445490.1  | lncRNA |
| ZNF32-AS1   | lncRNA |
| AC005253.1  | lncRNA |
| ACTN1-AS1   | lncRNA |
| AP001628.1  | lncRNA |
| AC132192.2  | lncRNA |
| TSC1        | NRG    |
| MAP3K7      | NRG    |
| BRAF        | NRG    |
| BCL2        | NRG    |
| FLT3        | NRG    |
| BACH2       | NRG    |
| GATA3       | NRG    |
| IDH1        | NRG    |
| RNF31       | NRG    |
| KLF9        | NRG    |
| DIABLO      | NRG    |
| CDKN2A      | NRG    |
| TRIM11      | NRG    |
| TNFRSF1B    | NRG    |
| DNMT1       | NRG    |
| ATRX        | NRG    |
| STAT3       | NRG    |
| MYC         | NRG    |
| LEF1        | NRG    |
| ID1         | NRG    |

|          |     |
|----------|-----|
| SLC39A7  | NRG |
| FASLG    | NRG |
| MLKL     | NRG |
| CYLD     | NRG |
| CD40     | NRG |
| BCL2L11  | NRG |
| TERT     | NRG |
| AXL      | NRG |
| SIRT1    | NRG |
| PLK1     | NRG |
| ZBP1     | NRG |
| HAT1     | NRG |
| MAPK8    | NRG |
| BNIP3    | NRG |
| SIRT3    | NRG |
| TRAF2    | NRG |
| TARDBP   | NRG |
| HSP90AA1 | NRG |
| DDX58    | NRG |
| PANX1    | NRG |
| FAS      | NRG |
| OTULIN   | NRG |
| MPG      | NRG |
| CFLAR    | NRG |
| MYCN     | NRG |
| TNFRSF1A | NRG |
| IDH2     | NRG |
| USP22    | NRG |
| FADD     | NRG |
| ITPK1    | NRG |

---
