# Supplementary material for: Comprehensive Characterization of Necroptosis‐Related lncRNAs in Bladder Cancer Identifies a Novel Signature for Prognosis Prediction
Source: Hindawi journal article supplement (doi:10.1155/2022/2360299), 2022-01-01
Supplement: f2 [file 2360299.f2.pdf]

| Gene         | logFC  | p-value | FDR   |
|--------------|--------|---------|-------|
| AL109955.1   | -1.872 | 0.000   | 0.000 |
| MCF2L-AS1    | 1.148  | 0.048   | 0.049 |
| AC025766.1   | 1.870  | 0.000   | 0.001 |
| AC087286.2   | -1.470 | 0.000   | 0.001 |
| AC073957.3   | 1.298  | 0.001   | 0.001 |
| CDKN2A-DT    | 3.485  | 0.005   | 0.008 |
| AL353622.2   | 1.613  | 0.000   | 0.001 |
| AL133467.1   | -1.458 | 0.000   | 0.001 |
| AL161891.1   | 1.240  | 0.000   | 0.000 |
| AC124312.2   | -1.944 | 0.000   | 0.000 |
| AC104785.1   | 1.952  | 0.000   | 0.000 |
| AC074117.1   | 1.253  | 0.000   | 0.000 |
| DNM3OS       | -1.015 | 0.000   | 0.000 |
| AC025031.1   | 1.057  | 0.016   | 0.019 |
| AC008764.6   | 1.699  | 0.000   | 0.000 |
| AC023908.3   | 1.875  | 0.000   | 0.000 |
| AC018809.1   | 1.843  | 0.000   | 0.000 |
| AC027449.1   | -3.693 | 0.000   | 0.000 |
| AL158166.1   | 2.809  | 0.000   | 0.000 |
| MIR1-1HG-AS1 | -3.924 | 0.000   | 0.000 |
| AC092803.1   | 5.131  | 0.000   | 0.000 |
| AL357054.4   | -1.214 | 0.000   | 0.000 |
| AC025280.1   | -3.681 | 0.000   | 0.000 |
| TFAP2A-AS1   | 1.771  | 0.000   | 0.000 |
| NCBP2-AS1    | 1.638  | 0.000   | 0.000 |
| AC015802.4   | 1.742  | 0.000   | 0.000 |
| AC027307.3   | -1.366 | 0.000   | 0.000 |
| LINC01322    | 3.325  | 0.011   | 0.015 |
| YEATS2-AS1   | 1.371  | 0.000   | 0.000 |
| MHENCRC      | 1.017  | 0.000   | 0.000 |
| AC079160.1   | 2.458  | 0.001   | 0.001 |
| AC026740.1   | 1.363  | 0.000   | 0.000 |
| AC087521.1   | -3.231 | 0.000   | 0.000 |
| AC108463.2   | 1.237  | 0.001   | 0.002 |
| AL391807.1   | -1.659 | 0.000   | 0.000 |
| LINC00641    | -1.875 | 0.000   | 0.000 |
| LINC02195    | 2.031  | 0.003   | 0.005 |
| LINC02489    | -3.042 | 0.000   | 0.000 |
| AL023284.4   | 1.282  | 0.002   | 0.003 |
| MIR497HG     | -2.119 | 0.000   | 0.000 |
| AC007128.2   | 2.691  | 0.000   | 0.000 |

|                |        |       |       |
|----------------|--------|-------|-------|
| AL133346.1     | -2.413 | 0.000 | 0.000 |
| AC018653.3     | 1.165  | 0.000 | 0.000 |
| AC107959.1     | -1.611 | 0.000 | 0.000 |
| AC036108.3     | -3.975 | 0.000 | 0.000 |
| MCCC1-AS1      | 1.001  | 0.001 | 0.002 |
| AC007622.2     | 1.053  | 0.001 | 0.002 |
| AC008608.2     | 1.067  | 0.000 | 0.000 |
| AL441992.1     | 1.151  | 0.000 | 0.000 |
| TMPO-AS1       | 1.253  | 0.000 | 0.000 |
| AL390067.1     | 1.894  | 0.000 | 0.000 |
| LINC02384      | -1.619 | 0.000 | 0.001 |
| AP005329.1     | 1.112  | 0.000 | 0.000 |
| MIR4435-2HG    | 1.324  | 0.000 | 0.000 |
| AL670729.1     | 1.942  | 0.000 | 0.000 |
| AC092376.2     | -2.669 | 0.000 | 0.000 |
| GATA3-AS1      | 1.367  | 0.020 | 0.024 |
| AC005387.1     | 1.570  | 0.000 | 0.000 |
| AP003071.4     | -2.575 | 0.000 | 0.000 |
| AP003086.2     | 1.667  | 0.010 | 0.013 |
| AC139887.1     | 1.122  | 0.002 | 0.003 |
| KDM4A-AS1      | 1.311  | 0.000 | 0.000 |
| WASHC5-AS1     | 1.783  | 0.000 | 0.000 |
| LINC01781      | -2.414 | 0.012 | 0.015 |
| MAGEA10-MAGEA5 | 2.566  | 0.005 | 0.007 |
| LINC00885      | 1.290  | 0.001 | 0.003 |
| XXYLT1-AS2     | -1.574 | 0.000 | 0.000 |
| AL078644.1     | 1.319  | 0.000 | 0.000 |
| U62317.1       | 2.800  | 0.000 | 0.000 |
| AC068790.7     | 1.095  | 0.005 | 0.007 |
| AC053503.4     | -3.147 | 0.000 | 0.000 |
| AL691482.3     | 1.299  | 0.029 | 0.032 |
| LINC00894      | 1.020  | 0.001 | 0.002 |
| MEG9           | -1.966 | 0.000 | 0.000 |
| LINC00941      | 1.955  | 0.031 | 0.033 |
| AL139041.1     | 1.188  | 0.001 | 0.001 |
| AP001625.2     | 1.127  | 0.013 | 0.016 |
| CRTC3-AS1      | 1.112  | 0.000 | 0.000 |
| C8orf44        | 1.097  | 0.000 | 0.000 |
| SH3RF3-AS1     | -1.145 | 0.000 | 0.000 |
| AC090825.1     | -1.750 | 0.000 | 0.000 |
| LINC01081      | -3.557 | 0.000 | 0.000 |
| AL161452.1     | 1.452  | 0.000 | 0.000 |
| ADAMTS9-AS1    | -4.704 | 0.000 | 0.000 |
| AC008735.2     | 1.761  | 0.000 | 0.000 |

|                            |        |       |       |
|----------------------------|--------|-------|-------|
| AC079313.2                 | -3.854 | 0.000 | 0.000 |
| AC010618.2                 | 1.488  | 0.000 | 0.000 |
| MAGI2-AS3                  | -1.924 | 0.000 | 0.000 |
| AL121652.1                 | 1.194  | 0.001 | 0.003 |
| AC013553.3                 | -1.293 | 0.000 | 0.000 |
| AC244034.2                 | 1.127  | 0.011 | 0.015 |
| AC023825.2                 | 1.136  | 0.021 | 0.024 |
| ZKSCAN2-DT                 | 1.319  | 0.000 | 0.000 |
| ZNF252P-AS1                | 2.204  | 0.000 | 0.000 |
| AF001548.1                 | -5.007 | 0.000 | 0.000 |
| AC010998.2                 | 1.640  | 0.005 | 0.007 |
| MYOSLID                    | 3.592  | 0.003 | 0.005 |
| NRIR                       | 2.974  | 0.000 | 0.000 |
| AC015849.4                 | 1.386  | 0.005 | 0.008 |
| AL132655.2                 | 2.318  | 0.006 | 0.008 |
| ZNF32-AS2                  | 1.086  | 0.000 | 0.001 |
| AC007128.1                 | 2.650  | 0.000 | 0.000 |
| AC002398.2                 | -3.398 | 0.000 | 0.000 |
| AC116407.2                 | 1.487  | 0.000 | 0.000 |
| LINC01213                  | 1.588  | 0.049 | 0.049 |
| LINC01675                  | 1.620  | 0.009 | 0.013 |
| AL157871.5                 | 1.356  | 0.001 | 0.001 |
| AC027601.3                 | 2.293  | 0.000 | 0.000 |
| AC073046.1                 | 1.206  | 0.004 | 0.006 |
| AP003352.1                 | 1.063  | 0.000 | 0.000 |
| AC099850.3                 | 2.250  | 0.000 | 0.000 |
| AL118511.1                 | 1.541  | 0.000 | 0.000 |
| AC010326.3                 | 1.242  | 0.000 | 0.000 |
| AL390728.4                 | 1.198  | 0.000 | 0.000 |
| AC092910.3                 | 1.221  | 0.000 | 0.000 |
| LINC02109                  | 3.125  | 0.000 | 0.001 |
| AC010976.2                 | -1.948 | 0.000 | 0.000 |
| LINC01411                  | 1.896  | 0.016 | 0.019 |
| AC012073.1                 | 2.302  | 0.000 | 0.000 |
| AP000892.3                 | -3.323 | 0.000 | 0.000 |
| AC092811.1                 | -1.769 | 0.000 | 0.000 |
| AL390294.1                 | 1.385  | 0.032 | 0.034 |
| AC024361.3                 | 1.819  | 0.000 | 0.000 |
| ACTA2-AS1                  | -2.719 | 0.000 | 0.000 |
| LINC01355                  | 1.491  | 0.000 | 0.000 |
| LINC02577                  | 3.101  | 0.000 | 0.000 |
| STAG3L5P-PVRIG2P-<br>PILRB | 1.028  | 0.000 | 0.000 |
| AC004449.1                 | 1.931  | 0.000 | 0.000 |

|             |        |       |       |
|-------------|--------|-------|-------|
| PSPC1-AS2   | 1.221  | 0.000 | 0.000 |
| AC018752.1  | -1.878 | 0.001 | 0.002 |
| AC004943.2  | 1.074  | 0.000 | 0.000 |
| SNHG10      | 1.293  | 0.000 | 0.000 |
| CDKN2B-AS1  | 2.806  | 0.002 | 0.003 |
| AC024451.4  | 1.442  | 0.000 | 0.000 |
| NDUFB2-AS1  | 1.181  | 0.000 | 0.000 |
| A2M-AS1     | -1.249 | 0.000 | 0.000 |
| AL928654.2  | 1.038  | 0.001 | 0.001 |
| HAND2-AS1   | -3.973 | 0.000 | 0.000 |
| AL161772.1  | 2.359  | 0.000 | 0.000 |
| AL590729.1  | 1.190  | 0.003 | 0.004 |
| AC010168.2  | 1.555  | 0.000 | 0.000 |
| LINC01820   | 3.737  | 0.002 | 0.003 |
| GHRLOS      | 1.567  | 0.000 | 0.000 |
| AC005180.1  | -4.790 | 0.000 | 0.000 |
| AL117329.1  | 3.455  | 0.000 | 0.001 |
| AC091057.1  | 1.788  | 0.000 | 0.000 |
| LINC02100   | 2.565  | 0.000 | 0.000 |
| FLJ12825    | 2.030  | 0.000 | 0.000 |
| AC011477.3  | 1.167  | 0.001 | 0.002 |
| AC027601.1  | 1.252  | 0.000 | 0.000 |
| AC245060.6  | 1.404  | 0.000 | 0.000 |
| AC007637.1  | -1.802 | 0.000 | 0.000 |
| AC011461.1  | 1.372  | 0.000 | 0.000 |
| MORF4L2-AS1 | 1.172  | 0.001 | 0.001 |
| AC010491.1  | 1.656  | 0.000 | 0.000 |
| AC008750.1  | 1.364  | 0.003 | 0.005 |
| AL139352.1  | 1.930  | 0.047 | 0.048 |
| ATP2A1-AS1  | 1.555  | 0.000 | 0.000 |
| AC022893.1  | -2.524 | 0.000 | 0.001 |
| HHIP-AS1    | -2.006 | 0.000 | 0.000 |
| AC006557.1  | 1.444  | 0.001 | 0.002 |
| AL032819.1  | 2.035  | 0.000 | 0.001 |
| C1orf220    | 1.071  | 0.004 | 0.006 |
| GNG12-AS1   | -1.452 | 0.000 | 0.000 |
| AC134043.2  | -1.680 | 0.000 | 0.000 |
| LINC01833   | 2.662  | 0.002 | 0.004 |
| CARMN       | -3.721 | 0.000 | 0.000 |
| RUSC1-AS1   | 1.507  | 0.000 | 0.000 |
| MEG3        | -1.183 | 0.000 | 0.000 |
| AC025031.4  | 1.152  | 0.000 | 0.000 |
| MBNL1-AS1   | -3.657 | 0.000 | 0.000 |
| LINC01936   | -1.721 | 0.000 | 0.000 |

|             |        |       |       |
|-------------|--------|-------|-------|
| AC092119.2  | 1.573  | 0.000 | 0.000 |
| ZNF436-AS1  | 1.020  | 0.002 | 0.003 |
| PCAT7       | 1.201  | 0.001 | 0.003 |
| AC105339.2  | 1.270  | 0.000 | 0.000 |
| MAP3K14-AS1 | 1.086  | 0.000 | 0.001 |
| NKILA       | 1.922  | 0.009 | 0.012 |
| AP006621.2  | 1.216  | 0.001 | 0.002 |
| AC127024.4  | 1.104  | 0.001 | 0.001 |
| AL590652.1  | 1.075  | 0.002 | 0.003 |
| LINC01342   | 1.247  | 0.046 | 0.047 |
| AC034102.8  | 1.229  | 0.021 | 0.024 |
| AL731567.1  | 1.458  | 0.002 | 0.004 |
| AC093788.1  | 1.403  | 0.000 | 0.000 |
| AC080129.2  | 1.254  | 0.006 | 0.009 |
| GAS6-DT     | -1.967 | 0.000 | 0.000 |
| LINC01719   | 1.155  | 0.002 | 0.003 |
| U62317.2    | 1.291  | 0.000 | 0.000 |
| WASIR2      | 2.065  | 0.000 | 0.001 |
| AC010201.2  | 1.181  | 0.001 | 0.002 |
| AL449423.1  | 4.569  | 0.000 | 0.000 |
| AC020928.1  | 2.368  | 0.019 | 0.022 |
| AL161729.4  | 1.697  | 0.000 | 0.000 |
| STAM-AS1    | 2.012  | 0.000 | 0.000 |
| AC124944.3  | 1.443  | 0.000 | 0.000 |
| AC109460.2  | 1.204  | 0.001 | 0.001 |
| AP001189.1  | -1.773 | 0.000 | 0.000 |
| LINC02178   | 1.642  | 0.012 | 0.015 |
| C9orf163    | 2.692  | 0.000 | 0.000 |
| AC106881.1  | -2.457 | 0.000 | 0.000 |
| AC010542.5  | 1.339  | 0.000 | 0.000 |
| LINC01140   | -1.096 | 0.000 | 0.000 |
| TTLL11-IT1  | 2.653  | 0.006 | 0.008 |
| AP000866.5  | 1.601  | 0.005 | 0.007 |
| AC119396.1  | -1.809 | 0.000 | 0.000 |
| AP002761.1  | 2.111  | 0.000 | 0.000 |
| AC005519.1  | 1.230  | 0.000 | 0.000 |
| AP003071.3  | -2.421 | 0.000 | 0.000 |
| LINC01134   | 2.004  | 0.000 | 0.000 |
| BX322562.1  | -1.137 | 0.000 | 0.000 |
| FENRR       | -3.552 | 0.000 | 0.000 |
| CYTOR       | 1.313  | 0.002 | 0.004 |
| MIR100HG    | -2.702 | 0.000 | 0.000 |
| AC021242.3  | 1.861  | 0.000 | 0.000 |
| GAS8-AS1    | 1.142  | 0.008 | 0.011 |

|            |        |       |       |
|------------|--------|-------|-------|
| AL021707.8 | 1.058  | 0.001 | 0.002 |
| NARF-IT1   | 1.081  | 0.002 | 0.003 |
| AC020663.2 | 1.190  | 0.002 | 0.004 |
| AC245052.4 | 1.022  | 0.000 | 0.000 |
| AL354993.2 | 1.003  | 0.005 | 0.007 |
| AL445423.1 | -2.429 | 0.000 | 0.000 |
| AC104971.1 | 1.231  | 0.004 | 0.006 |
| AC009148.1 | 2.175  | 0.000 | 0.000 |
| DCST1-AS1  | 2.181  | 0.000 | 0.000 |
| AL117350.1 | 1.141  | 0.042 | 0.043 |
| AL158166.2 | 1.615  | 0.016 | 0.019 |
| AL132642.1 | -3.208 | 0.000 | 0.000 |
| AP001619.1 | 1.302  | 0.011 | 0.014 |
| AL583785.1 | -1.328 | 0.000 | 0.000 |
| AL121832.3 | 2.492  | 0.000 | 0.000 |
| LINC00456  | 2.790  | 0.012 | 0.015 |
| LINC02202  | -2.397 | 0.000 | 0.000 |
| AC012645.2 | 2.034  | 0.003 | 0.005 |
| LINC01410  | 1.537  | 0.000 | 0.000 |
| LINC01082  | -3.900 | 0.000 | 0.000 |
| CAPN10-DT  | 1.373  | 0.000 | 0.000 |
| AP001107.5 | -3.921 | 0.000 | 0.000 |
| CEP83-DT   | 1.373  | 0.000 | 0.000 |
| AC004253.1 | 1.285  | 0.000 | 0.000 |
| LINC00702  | -3.115 | 0.000 | 0.000 |
| LINC01352  | -2.864 | 0.000 | 0.000 |
| CDC42-IT1  | 1.239  | 0.003 | 0.005 |
| AC016876.3 | 1.661  | 0.000 | 0.000 |
| AC020911.1 | 1.082  | 0.002 | 0.004 |
| AP001189.3 | -1.537 | 0.000 | 0.000 |
| AL157838.1 | 1.543  | 0.000 | 0.000 |
| SNHG9      | 1.108  | 0.002 | 0.004 |
| AL135999.1 | 1.004  | 0.000 | 0.001 |
| AC015819.1 | -1.009 | 0.017 | 0.021 |
| AC004034.1 | 1.972  | 0.000 | 0.000 |
| AC005180.2 | -4.617 | 0.000 | 0.000 |
| PTPRG-AS1  | 1.659  | 0.001 | 0.002 |
| LINC02584  | 1.982  | 0.005 | 0.007 |
| AC008543.3 | 1.235  | 0.029 | 0.032 |
| LINC02104  | -1.300 | 0.000 | 0.001 |
| AC021491.2 | 1.273  | 0.004 | 0.006 |
| AL592211.1 | 1.009  | 0.036 | 0.038 |
| AC083906.3 | 2.762  | 0.015 | 0.019 |
| MCM3AP-AS1 | 1.015  | 0.000 | 0.000 |

|             |        |       |       |
|-------------|--------|-------|-------|
| AC084125.2  | 1.612  | 0.000 | 0.000 |
| AC021683.1  | -1.951 | 0.000 | 0.000 |
| Z94721.1    | 1.829  | 0.000 | 0.000 |
| AC009299.2  | -2.088 | 0.000 | 0.000 |
| AC010271.2  | 1.067  | 0.042 | 0.043 |
| TSPOAP1-AS1 | -1.357 | 0.000 | 0.000 |
| NARF-AS1    | 3.303  | 0.000 | 0.000 |
| AC124312.3  | -1.560 | 0.000 | 0.000 |
| AC078795.1  | 1.627  | 0.000 | 0.000 |
| AC108860.2  | 1.839  | 0.000 | 0.000 |
| AL138995.1  | -1.532 | 0.000 | 0.000 |
| AC013403.2  | -1.103 | 0.000 | 0.000 |
| AC127070.1  | 1.197  | 0.003 | 0.005 |
| AL109741.1  | -1.341 | 0.000 | 0.000 |
| AL445490.1  | 2.154  | 0.005 | 0.007 |
| ZNF32-AS1   | 1.417  | 0.000 | 0.000 |
| AP001628.1  | 1.327  | 0.000 | 0.001 |
| AC132192.2  | 1.118  | 0.000 | 0.000 |

---
