# Supplementary material for: Comprehensive Characterization of Necroptosis‐Related lncRNAs in Bladder Cancer Identifies a Novel Signature for Prognosis Prediction
Source: Hindawi journal article supplement (doi:10.1155/2022/2360299), 2022-01-01
Supplement: f3 [file 2360299.f3.pdf]

| Gene                       | HR    | HR.95L | HR.95H | p-value |
|----------------------------|-------|--------|--------|---------|
| AC104785.1                 | 0.595 | 0.421  | 0.842  | 0.003   |
| AC074117.1                 | 0.832 | 0.732  | 0.946  | 0.005   |
| AC018809.1                 | 0.614 | 0.462  | 0.817  | 0.001   |
| AC015802.4                 | 0.223 | 0.089  | 0.557  | 0.001   |
| AL391807.1                 | 1.331 | 1.171  | 1.513  | 0.000   |
| AC018653.3                 | 0.768 | 0.641  | 0.921  | 0.004   |
| AP005329.1                 | 0.439 | 0.249  | 0.773  | 0.004   |
| AC005387.1                 | 0.654 | 0.493  | 0.868  | 0.003   |
| AL078644.1                 | 1.676 | 1.159  | 2.424  | 0.006   |
| AC068790.7                 | 0.249 | 0.095  | 0.651  | 0.005   |
| C8orf44                    | 0.727 | 0.604  | 0.876  | 0.001   |
| AC010618.2                 | 0.592 | 0.408  | 0.859  | 0.006   |
| AC023825.2                 | 0.162 | 0.042  | 0.619  | 0.008   |
| ZKSCAN2-DT                 | 0.676 | 0.518  | 0.882  | 0.004   |
| AL132655.2                 | 0.573 | 0.379  | 0.866  | 0.008   |
| ZNF32-AS2                  | 0.684 | 0.528  | 0.885  | 0.004   |
| AP003352.1                 | 0.877 | 0.807  | 0.954  | 0.002   |
| AC010326.3                 | 0.938 | 0.896  | 0.983  | 0.007   |
| LINC01355                  | 0.815 | 0.703  | 0.944  | 0.007   |
| STAG3L5P-PVRIG2P-<br>PILRB | 0.540 | 0.398  | 0.734  | 0.000   |
| AC024451.4                 | 0.414 | 0.237  | 0.723  | 0.002   |
| AC010168.2                 | 0.712 | 0.575  | 0.882  | 0.002   |
| FLJ12825                   | 0.187 | 0.059  | 0.593  | 0.004   |
| AC011477.3                 | 0.885 | 0.808  | 0.968  | 0.008   |
| AC010491.1                 | 0.289 | 0.133  | 0.627  | 0.002   |
| LINC01833                  | 0.892 | 0.823  | 0.966  | 0.005   |
| LINC01936                  | 4.588 | 1.576  | 13.356 | 0.005   |
| ZNF436-AS1                 | 0.859 | 0.773  | 0.956  | 0.005   |
| MAP3K14-AS1                | 0.671 | 0.510  | 0.884  | 0.004   |
| AL731567.1                 | 0.919 | 0.870  | 0.971  | 0.003   |
| AC093788.1                 | 0.606 | 0.461  | 0.796  | 0.000   |
| AC080129.2                 | 0.672 | 0.508  | 0.887  | 0.005   |
| AC010201.2                 | 0.545 | 0.354  | 0.839  | 0.006   |
| AC010542.5                 | 0.840 | 0.760  | 0.929  | 0.001   |
| BX322562.1                 | 1.224 | 1.060  | 1.414  | 0.006   |
| AL021707.8                 | 0.815 | 0.735  | 0.904  | 0.000   |
| AL583785.1                 | 1.067 | 1.020  | 1.116  | 0.005   |
| AC004253.1                 | 0.713 | 0.554  | 0.917  | 0.008   |
| AC020911.1                 | 0.162 | 0.053  | 0.496  | 0.001   |
| AC008543.3                 | 0.342 | 0.164  | 0.711  | 0.004   |

|            |       |       |       |       |
|------------|-------|-------|-------|-------|
| AC009299.2 | 1.606 | 1.164 | 2.215 | 0.004 |
| ZNF32-AS1  | 0.644 | 0.472 | 0.879 | 0.006 |

---
