# Supplementary material for: Comprehensive Characterization of Necroptosis‐Related lncRNAs in Bladder Cancer Identifies a Novel Signature for Prognosis Prediction
Source: Hindawi journal article supplement (doi:10.1155/2022/2360299), 2022-01-01
Supplement: f4 [file 2360299.f4.pdf]

---

| Gene                   | Coef   |
|------------------------|--------|
| AC015802.4             | -0.488 |
| AL391807.1             | 0.166  |
| AL078644.1             | 0.204  |
| AC023825.2             | -1.212 |
| AL132655.2             | -0.005 |
| AP003352.1             | -0.045 |
| STAG3L5P-PVRIG2P-PILRB | -0.172 |
| AC024451.4             | -0.084 |
| MAP3K14-AS1            | -0.140 |
| AL731567.1             | -0.025 |
| AC010542.5             | -0.003 |
| AC009299.2             | 0.123  |

---
