# Supplementary material for: Comprehensive Characterization of Necroptosis‐Related lncRNAs in Bladder Cancer Identifies a Novel Signature for Prognosis Prediction
Source: Hindawi journal article supplement (doi:10.1155/2022/2360299), 2022-01-01
Supplement: f5 [file 2360299.f5.pdf]

| Variable  | univariate Cox regression |        |        |         | multivariate Cox regression |        |        |         |
|-----------|---------------------------|--------|--------|---------|-----------------------------|--------|--------|---------|
|           | HR                        | HR.95L | HR.95H | p-value | HR                          | HR.95L | HR.95H | p-value |
| Age       | 1.034                     | 1.018  | 1.051  | 0.000   | 1.030                       | 1.014  | 1.046  | 0.000   |
| Gender    | 0.894                     | 0.644  | 1.241  | 0.504   |                             |        |        |         |
| Stage     | 1.743                     | 1.437  | 2.114  | 0.000   | 1.634                       | 1.342  | 1.989  | 0.000   |
| Grade     | 0.347                     | 0.086  | 1.403  | 0.138   |                             |        |        |         |
| riskScore | 2.262                     | 1.664  | 3.076  | 0.000   | 2.058                       | 1.574  | 2.692  | 0.000   |
