# Supplementary material for: Comprehensive Characterization of Necroptosis‐Related lncRNAs in Bladder Cancer Identifies a Novel Signature for Prognosis Prediction
Source: Hindawi journal article supplement (doi:10.1155/2022/2360299), 2022-01-01
Supplement: f6 [file 2360299.f6.pdf]

| Covariates | subgroups    | Total       | high        | low         | chi    | p-value |
|------------|--------------|-------------|-------------|-------------|--------|---------|
| Age        | <=65         | 160(39.41%) | 76(37.07%)  | 84(41.79%)  | 0.759  | 0.384   |
|            | >65          | 246(60.59%) | 129(62.93%) | 117(58.21%) |        |         |
| Gender     | FEMALE       | 107(26.35%) | 63(30.73%)  | 44(21.89%)  | 3.645  | 0.056   |
|            | MALE         | 299(73.65%) | 142(69.27%) | 157(78.11%) |        |         |
| T          | T1-2         | 201(49.51%) | 88(42.93%)  | 113(56.22%) | 8.567  | 0.014   |
|            | T3-4         | 199(49.01%) | 115(56.1%)  | 84(41.79%)  |        |         |
|            | Unknown      | 6(1.48%)    | 2(0.98%)    | 4(1.99%)    |        |         |
| N          | N0           | 236(58.13%) | 115(56.1%)  | 121(60.2%)  | 5.620  | 0.060   |
|            | N1-3         | 128(31.53%) | 74(36.1%)   | 54(26.87%)  |        |         |
|            | Unknown      | 42(10.34%)  | 16(7.8%)    | 26(12.94%)  |        |         |
| M          | M0           | 195(48.03%) | 88(42.93%)  | 107(53.23%) | 4.631  | 0.099   |
|            | M1           | 11(2.71%)   | 7(3.41%)    | 4(1.99%)    |        |         |
|            | Unknown      | 200(49.26%) | 110(53.66%) | 90(44.78%)  |        |         |
| Stage      | Stage I-II   | 131(32.27%) | 53(25.85%)  | 78(38.81%)  | 10.253 | 0.006   |
|            | Stage III-IV | 273(67.24%) | 152(74.15%) | 121(60.2%)  |        |         |
|            | Unknown      | 2(0.49%)    | 0(0%)       | 2(1%)       |        |         |
| Grade      | High Grade   | 383(94.33%) | 198(96.59%) | 185(92.04%) | 3.936  | 0.140   |
|            | Low Grade    | 20(4.93%)   | 6(2.93%)    | 14(6.97%)   |        |         |
|            | Unknown      | 3(0.74%)    | 1(0.49%)    | 2(1%)       |        |         |
