# Supplementary material for: Comprehensive Characterization of Necroptosis‐Related lncRNAs in Bladder Cancer Identifies a Novel Signature for Prognosis Prediction
Source: Hindawi journal article supplement (doi:10.1155/2022/2360299), 2022-01-01
Supplement: f7 [file 2360299.f7.pdf]

| NAME                                                      | NES   | NOM p-val | FDR q-val |
|-----------------------------------------------------------|-------|-----------|-----------|
| KEGG_FOCAL_ADHESION                                       | 2.309 | 0.000     | 0.000     |
| KEGG_ARRHYTHMOGENIC_RIGHT_VENTRICULAR_CARDIOMYOPATHY_ARVC | 2.271 | 0.000     | 0.000     |
| KEGG_MELANOMA                                             | 2.215 | 0.000     | 0.000     |
| KEGG_PATHOGENIC_ESCHERICHIA_COLI_INFECTION                | 2.225 | 0.000     | 0.000     |
| KEGG_REGULATION_OF_ACTIN_CYTOSKELETON                     | 2.239 | 0.000     | 0.000     |
| KEGG_ECM_RECEPTOR_INTERACTION                             | 2.261 | 0.000     | 0.000     |
| KEGG_HYPERTROPHIC_CARDIOMYOPATHY_HCM                      | 2.117 | 0.000     | 0.002     |
| KEGG_DILATED_CARDIOMYOPATHY                               | 2.083 | 0.000     | 0.003     |
| KEGG_AXON_GUIDANCE                                        | 2.058 | 0.000     | 0.004     |
| KEGG_PRION_DISEASES                                       | 2.005 | 0.000     | 0.009     |
| KEGG_PATHWAYS_IN_CANCER                                   | 1.972 | 0.000     | 0.011     |
| KEGG_WNT_SIGNALING_PATHWAY                                | 1.893 | 0.000     | 0.018     |
| KEGG_LEUKOCYTE_TRANSENDOTHELIAL_MIGRATION                 | 1.901 | 0.000     | 0.018     |
| KEGG_CALCIUM_SIGNALING_PATHWAY                            | 1.906 | 0.000     | 0.018     |
| KEGG_GAP_JUNCTION                                         | 1.908 | 0.002     | 0.019     |
| KEGG_BLADDER_CANCER                                       | 1.914 | 0.002     | 0.020     |
| KEGG_GLIOMA                                               | 1.917 | 0.000     | 0.021     |
| KEGG_RENIN_ANGIOTENSIN_SYSTEM                             | 1.868 | 0.000     | 0.022     |
| KEGG_TGF_BETA_SIGNALING_PATHWAY                           | 1.864 | 0.008     | 0.022     |
| KEGG_GLYCOSAMINOGLYCAN_BIOSYNTHESIS_CHONDROITIN_SULFATE   | 1.851 | 0.013     | 0.024     |
| KEGG_SMALL_CELL_LUNG_CANCER                               | 1.784 | 0.004     | 0.036     |
| KEGG_PROTEASOME                                           | 1.788 | 0.017     | 0.036     |
| KEGG_PANCREATIC_CANCER                                    | 1.779 | 0.004     | 0.036     |

|                                             |       |       |       |
|---------------------------------------------|-------|-------|-------|
| KEGG_ADHERENS_JUNCTION                      | 1.797 | 0.006 | 0.036 |
| KEGG_CYTOKINE_CYTOKINE_RECEPTOR_INTERACTION | 1.793 | 0.006 | 0.036 |
| KEGG_TIGHT_JUNCTION                         | 1.769 | 0.006 | 0.037 |
| KEGG_VIRAL_MYOCARDITIS                      | 1.772 | 0.014 | 0.037 |
| KEGG_MAPK_SIGNALING_PATHWAY                 | 1.798 | 0.002 | 0.038 |
| KEGG_RENAL_CELL_CARCINOMA                   | 1.747 | 0.012 | 0.044 |

---
