# Supplementary material for: Comprehensive Characterization of Necroptosis‐Related lncRNAs in Bladder Cancer Identifies a Novel Signature for Prognosis Prediction
Source: Hindawi journal article supplement (doi:10.1155/2022/2360299), 2022-01-01
Supplement: f8 [file 2360299.f8.pdf]

| Gene                   | Drug                   | cor    | p-value |
|------------------------|------------------------|--------|---------|
| MAP3K14-AS1            | Ibrutinib              | 0.387  | 0.002   |
|                        | Lapatinib              | 0.367  | 0.004   |
|                        | Selumetinib            | -0.366 | 0.004   |
|                        | Everolimus             | 0.354  | 0.006   |
|                        | Dacomitinib            | 0.337  | 0.008   |
|                        | Temsirolimus           | 0.333  | 0.009   |
|                        | Gefitinib              | 0.329  | 0.010   |
|                        | ARRY-162               | -0.306 | 0.018   |
|                        | Neratinib              | 0.305  | 0.018   |
|                        | Afatinib               | 0.303  | 0.019   |
|                        | Encorafenib            | -0.302 | 0.019   |
|                        | Pipamperone            | -0.280 | 0.030   |
|                        | Erlotinib              | 0.276  | 0.033   |
|                        | Cobimetinib (isomer 1) | -0.274 | 0.034   |
|                        | Vemurafenib            | -0.272 | 0.035   |
| Carmustine             | -0.268                 | 0.039  |         |
| STAG3L5P-PVRIG2P-PILRB | DECITABINE             | 0.264  | 0.041   |
